# Supplementary material
Source: PubMed Central journal article supplement (PMC5018216)
Supplement: NIHMS69116-supplement-Supplementary_tables.pdf [file NIHMS69116-supplement-Supplementary_tables.pdf]

| <b>OMP</b>   | <b>No. of <math>\beta</math>-strands</b> | <b>Molecular weight* (kDa)</b> | <b>Function</b>        |
|--------------|------------------------------------------|--------------------------------|------------------------|
| <b>tOmpA</b> | 8                                        | 18.875                         | Adhesin/invasin/evasin |
| <b>PagP</b>  | 8                                        | 19.110                         | Acyl transferase       |
| <b>OmpT</b>  | 10                                       | 35.284 <sup>‡</sup>            | Protease               |
| <b>OmpF</b>  | 16                                       | 37.216                         | Porin                  |
| <b>tBamA</b> | 16                                       | 43.240                         | Insertase/secretase    |

**Supplementary Table 1: Model OMPs investigated have a range of functions, sizes and number of  $\beta$ -strands.** \*Molecular weight of the mature OMP sequences, lacking their cleavable N-terminal signal sequences. <sup>‡</sup> Molecular weight for the OmpT construct used here including an N-terminal hexahistidine tag and a TEV protease cleavage site.

| <b>OMP</b>   | <b>OMP:Skp ratio</b> | <b><math>k_1</math> (<math>\times 10^{-3} \text{ s}^{-1}</math>)</b> | <b><math>k_2</math> (<math>\times 10^{-3} \text{ s}^{-1}</math>)</b> |
|--------------|----------------------|----------------------------------------------------------------------|----------------------------------------------------------------------|
| <b>tOmpA</b> | OMP alone            | $15.7 \pm 0.6$                                                       | N/A                                                                  |
|              | 1:1                  | $11.1 \pm 1.4$                                                       | $1.3 \pm 0.1$                                                        |
|              | 1:2                  | No folding                                                           | No folding                                                           |
| <b>PagP</b>  | OMP alone            | $3.8 \pm 0.8$                                                        | $0.8 \pm 0.1$                                                        |
|              | 1:1                  | $1.2 \pm 0.3$                                                        | $0.1 \pm 0.02$                                                       |
|              | 1:2                  | No folding                                                           | No folding                                                           |
| <b>OmpF</b>  | OMP alone            | $10.5 \pm 0.6$                                                       | $0.5 \pm 0.2$                                                        |
|              | 1:2                  | $1.8 \pm 0.2$                                                        | N/A                                                                  |
|              | 1:4                  | No folding                                                           | No folding                                                           |
| <b>tBamA</b> | OMP alone            | $12.8 \pm 2.4$                                                       | $1.6 \pm 0.3$                                                        |
|              | 1:2                  | $7.6 \pm 0.6$                                                        | $1.4 \pm 0.4$                                                        |
|              | 1:4                  | No folding                                                           | No folding                                                           |

**Supplementary Table 2: Measured rate constants for OMP folding into liposomes after pre-incubation with varying molar ratios of Skp.** Data are shown as the mean  $\pm$  the standard deviation of the rate constants obtained from three separate folding experiments, each using independently prepared batches of liposomes. For each batch of liposomes at least three folding transients were fitted globally to obtain the rate constants shown. N/A: The kinetic traces for the condition were adequately described by a single exponential.

| <b>Complex</b> | <b>Expected Mass (Da)</b> | <b>Observed Mass (Da)</b> |
|----------------|---------------------------|---------------------------|
| Skp            | 47,075                    | 47,125 ± 10               |
| 1:1 Skp:tOmpA  | 65,818                    | 65,898 ± 12               |
| 1:1 Skp:PagP   | 66,185                    | 66,208 ± 15               |
| 1:1 Skp:OmpT   | 82,355                    | 83,304 ± 20               |
| 2:1 Skp:OmpT   | 129,430                   | 130,542 ± 14              |
| 1:1 Skp:OmpF   | 84,220                    | 84,210 ± 18               |
| 2:1 Skp:OmpF   | 131,295                   | 131,337 ± 11              |
| 1:1 Skp:tBamA  | 90,315                    | 90,183 ± 5                |
| 2:1 Skp:tBamA  | 137,390                   | 137,303 ± 8               |

**Supplementary Table 3: Observed and expected masses for the complexes studied.**

For mass measurements, mass spectrometry conditions were optimised empirically for each sample to decrease peak widths, by increasing the cone voltage and trap collision energy, (typically 100 V and 40 V, respectively), relative to the gentler conditions used to acquire IMS data.

| <b>Skp</b>           |            | <b>1:1 Skp:tOmpA</b> |             | <b>1:1 Skp: PagP</b> |            | <b>1:1 Skp:OmpT</b>  |             | <b>1:1 Skp:OmpF</b> |            |
|----------------------|------------|----------------------|-------------|----------------------|------------|----------------------|-------------|---------------------|------------|
| <b>z</b>             | <b>CCS</b> | <b>z</b>             | <b>CCS</b>  | <b>z</b>             | <b>CCS</b> | <b>z</b>             | <b>CCS</b>  | <b>z</b>            | <b>CCS</b> |
| 13                   | 36.4 ± 0.2 | 15                   | 45.6 ± 0.1  | 15                   | 45.8 ± 0.3 | 17                   | 51.4 ± 0.8  | 17                  | 51.8 ± 0.3 |
| 13                   | 37.9 ± 0.6 | 16                   | 46.1 ± 0.3  | 16                   | 45.8 ± 0.1 | 18                   | 53.0 ± 0.4  | 18                  | 52.8 ± 0.6 |
| 14                   | 37.1 ± 0.2 | 17                   | 46.5 ± 0.6  | 17                   | 45.8 ± 0.2 | 19                   | 53.9 ± 0.7  | 19                  | 54.2 ± 0.2 |
| 14                   | 38.8 ± 0.3 | 18                   | 47.3 ± 0.2  |                      |            | 20                   | 57.1 ± 0.2  | 20                  | 55.1 ± 0.2 |
| 15                   | 39.3 ± 0.6 |                      |             |                      |            |                      |             |                     |            |
| 16                   | 40.8 ± 0.6 |                      |             |                      |            |                      |             |                     |            |
| <b>1:1 Skp:tBamA</b> |            | <b>2:1 Skp:OmpT</b>  |             | <b>2:1 Skp:OmpF</b>  |            | <b>2:1 Skp:tBamA</b> |             |                     |            |
| <b>z</b>             | <b>CCS</b> | <b>z</b>             | <b>CCS</b>  | <b>z</b>             | <b>CCS</b> | <b>z</b>             | <b>CCS</b>  |                     |            |
| 18                   | 54.2 ± 0.3 | 22                   | 71.7 ± 0.04 | 22                   | 71.2 ± 0.5 | 22                   | 72.8 ± 0.2  |                     |            |
| 19                   | 55.6 ± 0.8 | 23                   | 72.7 ± 0.03 | 23                   | 72.1 ± 0.9 | 23                   | 74.1 ± 0.1  |                     |            |
| 20                   | 57.4 ± 0.6 | 24                   | 74.4 ± 0.02 | 24                   | 73.4 ± 0.4 | 24                   | 75.5 ± 0.5  |                     |            |
|                      |            | 25                   | 76.2 ± 0.4  | 25                   | 75.1 ± 0.1 | 25                   | 75.7 ± 0.3  |                     |            |
|                      |            |                      |             | 26                   | 76.9 ± 0.6 | 26                   | 78.20 ± 0.1 |                     |            |

**Supplementary Table 4: Experimentally determined modal collision cross-sections (CCSs) (nm<sup>2</sup>) for the observed charge states (z) of Skp and the Skp assemblies. CCS values are shown as mean ± standard deviation of three independent measurements.**

| Protein(s)                        | Calculated CCS from simulation (nm <sup>2</sup> ) | CCS measured by IMS-MS (nm <sup>2</sup> ) |
|-----------------------------------|---------------------------------------------------|-------------------------------------------|
| tOmpA alone                       | 19.0 ± 0.06                                       | -                                         |
| tBamA alone                       | 37.9 ± 0.9                                        | -                                         |
| 1:1 Skp-tOmpA ( <i>in vacuo</i> ) | 43.7 ± 1.2                                        | 45.6 ± 0.1                                |
| 2:1 Skp:tBamA ( <i>in vacuo</i> ) | 74.4 ± 1.4                                        | 72.8 ± 0.2                                |
| Skp ( <i>in vacuo</i> )           | 37.3 ± 1.9                                        | 37.9 ± 0.6                                |
| 1:1 Skp-tOmpA (H <sub>2</sub> O)  | 56.5 ± 0.3                                        | -                                         |
| 2:1 Skp:tBamA (H <sub>2</sub> O)  | 101.2 ± 6.0                                       | -                                         |

**Supplementary Table 5: Comparison of CCS values from MD simulations and IMS-MS measurements.** CCS values from IMS-MS are shown as the mean ± standard deviation of the modal value of the lowest charge state ion from three independent measurements. CCS values from the simulations are the mean ± standard deviation for the endpoint structures at 100 ns from three independent simulations. For globular assemblies, the error between measured CCS values and those computed from atomic coordinates is below 3% (Benesch, J.L. & Ruotolo, B.T. *Curr Opin Struct Biol* **21** 641-9, 2011).
